# Supplementary material for: Cell-activatable CdSe fluorescence probe for dual-targeted imaging and drug application
Source: Royal Society of Chemistry journal article supplement (doi:10.1039/c4ay01445f), 2014-01-01
Supplement: c4ay01445f1.pdf [file c4ay01445f1.pdf]

## Supporting Information

### Cell-Activatable CdSe Fluorescence Probe for Dual-Targeted Imaging and Drug Application

Guitao Jie<sup>a</sup>, Guifen Jie<sup>b\*</sup>

- a *Haemal internal medicine, Yishui central hospital in linyi City, Yishui County 276400, Linyi, Shandong, (P.R. China)*
- b *Key Laboratory of Eco-chemical Engineering, Ministry of Education, College of Chemistry and Molecular Engineering, Qingdao University of Science and Technology, Qingdao, 266042, (P.R. China)*

---

\* Corresponding author. Tel.: +86-532-84022750; Fax: +86-532-84022750.

E-mail: guifenjie@126.com

## 1. Materials and Methods

### 1.1. Materials and Apparatus

selenium (99.9%, powder), sodium borohydride,  $\text{CdCl}_2$ , 2-aminoethanethiol (AET), 3, 3'-dithiodipropionic acid, dimethyl sulfoxide (DMSO), Folic acid, Doxorubicin (Doxo), N-hydroxysuccinimide (NHS), ethanediamine, glutathione (GSH), and 1-Ethyl-3-(3-dimethylaminopropyl)-carbodiimide hydrochloride (EDC) were purchased from Sigma-Aldrich and used without further purification. 0.1 M PBS buffer (pH 7.4) were prepared according to the standard methods. All other reagents were of analytical grade. Double distilled water was used for all experiments.

Cells: Ramos cells (CRL-1596, B-cell, human Burkitt's lymphoma) and MCF-7 cells were obtained from Chinese Academy of Medical Sciences. The cells were cultured in RPMI 1640 medium supplemented with 10% fetal bovine serum (FBS) and 100 IU/mL penicillin-Streptomycin. The cell density was determined using a hemocytometer, and this was performed prior to any experiments. After which,  $\sim 1$  million cells dispersed in RPMI 1640 cell media buffer were centrifuged at 3000 rpm for 5 min and redispersed in cell media three times and were then redispersed in 1 mL cell media buffer. During all experiments, the cells were kept in an ice bath at 4 °C.

Transmission electron microscopy (TEM) images were recorded using a JEOL JSM-6700F instrument (Hitachi). Photoluminescence (PL) spectra were obtained on an RF-540 spectrophotometer (Shimadzu). Scanning Laser Confocal Microscopy was performed on a Leica TCS SP5 II apparatus. The specimen were excited using 488 nm laser beam (Argon ion laser), observed using an HCX PL APO 40/0.85 objective, and the fluorescence images in the range 585-660 nm were recorded along with the transmitted-light image.

### 1.2. Synthesis of $\text{CdSe-NH}_2$ nanocrystals

Briefly, 0.05 g of selenium powder and 0.037 g of sodium borohydride were added to a small flask, then 4 mL of ultrapure water was added. The solution was degassed, refilled with nitrogen and heated to 80 °C. After the selenium powder disappeared completely, the resulting clear  $\text{NaHSe}$  of 0.1 M was obtained.

Colloidal  $\text{CdSe-NH}_2$  nanocrystals were prepared as described with a slight modification [s1]. Briefly, freshly prepared 0.1 M  $\text{NaHSe}$  solution was added to 1.25 mM  $\text{N}_2$ -saturated  $\text{CdCl}_2$

solution, then 2-aminoethanethiol (AET) as the stabilizing agent was added, and the pH was adjusted to 5.6-5.9. The molar ratio of  $\text{Cd}^{2+}$ /AET/HSe<sup>-</sup> was fixed at 1:2.4:0.5. After the mixture was vigorously stirred for 10 min, it was refluxed for 3 h to control the growth of the CdSe nanocrystals.

#### *1.3. Conjugation of 3, 3'-dithiodipropionic to CdSe-NH<sub>2</sub> nanocrystals*

The solution of EDC (0.1 mol/L, 100  $\mu\text{L}$ ) and NHS (0.025 mol/L, 100  $\mu\text{L}$ ) were added to 3 mL of 3, 3'-dithiodipropionic acid dissolved in dimethyl sulfoxide (DMSO), and incubated at 25 °C for 30 min. Then 1 mL of the QDs solution was added to the mixed solution and incubated at 4 °C for 12 h. After isolation of impurity through ultrafiltration, the resulting QDs were redispersed in 1 mL of water.

#### *1.4. Amino-functionalization of folic acid*

Folic acid (0.0812 g) was dissolved in 4 mL of ultrapure water, then EDC (0.1 mol/L, 100  $\mu\text{L}$ ) and NHS (0.025 mol/L, 100  $\mu\text{L}$ ) were added to the solution and incubated for 30 min. After 1 mL of ethanediamine was added and shaken gently for 12 h at room temperature, the solution was distilled to remove superfluous ethanediamine and water, and dissolved in 10 mL of PBS (pH 7.4).

#### *1.5. Activation of doxorubicin hydrochloride*

The doxorubicin hydrochloride (1.1 mg) was dissolved in 1 mL of PBS (pH 8.4). Then the resulting solution was centrifuged, and the solid pellet was dissolved in 1 mL of DMSO.

#### *1.6. Synthesis of the doxorubicin-QDs-folate nanoconjugate*

EDC (100  $\mu\text{L}$ , 0.1 mol/L) and NHS (100  $\mu\text{L}$ , 0.025 mol/L) were added to the solution of CdSe-dithiodipropionic acid conjugate, and incubated for 30 min. Then the solution was added to the mixture of amino-functionalized folic acid (1 mL) and doxorubicin hydrochloride (1 mL), and incubated at 4 °C for 12 h. After ultrafiltration two times, the resulting doxorubicin-QDs-folate nanoconjugate were redispersed in 1 mL of PBS (10 mM).

#### *1.7. The doxorubicin-QDs-folate nanoconjugate for targeted imaging and therapy of cancer cells*

500  $\mu\text{L}$  of Ramos cells were centrifuged at 2000 rpm for 3 min and redispersed in 200  $\mu\text{L}$  of PBS (10 mM). Then 200  $\mu\text{L}$  of the above QDs probe was added to the cells buffer and incubated at 37 °C for 30 min with gentle shaking, then the solution was centrifuged, washed, and resuspended in buffer.

#### *1.8. Microscopy Sample Preparation imaging*

For confocal microscopy imaging, 10  $\mu$ L sample solution was deposited onto a microscope slide and covered with a standard microscope slide. The fluorescent QDs and labeled cancer cells were observed with HCX PL APO 40/0.85 objective. The apoptosis of cancer cell were observed by optical microscopy (OM) and fluorescent microscopy (FM). 380-420 nm excitation light source were employed for this experiment. The Nikon E800 inverted microscope with a Nikon Digital sight DS-U1 camera was employed for OM and FM imaging.

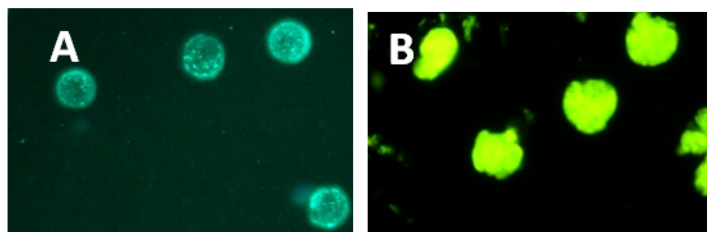

**Figure S1:** (A) Fluorescence microscopy images of FR(+) cells stained by green fluorescein and preincubated with excess free folic acid, before incubation with the activatable QDs probe; (B) FR(-) cells were treated with doxorubicin-QDs-folate nanoconjugate

#### References

[s1] S. Santra, C. Kaittanis, J. M. Perez, *Mol. Pharmaceutics*, 2010, 7, 1209.
